# Supplementary material for: Energy metabolism disorder dictates chronic hypoxia damage in heart defect with tetralogy of fallot
Source: Front Cardiovasc Med. 2023 Jan 18;9:1096664. doi: 10.3389/fcvm.2022.1096664 (PMC9889939; doi:10.3389/fcvm.2022.1096664)
Supplement: Supplementary file 3 [file Table_3.XLSX]

## Sheet: Sheet1
Index	Formula	Compounds	CAS	ASD-pre1	ASD-pre2	ASD-pre3	ASD-post1	ASD-post2	ASD-post3	VIP	Fold_Change	Log2FC	Type
MEDP1426	C13H23NO6	Carnitine C6:DC	-	15155	40475	104980	9	9	9	1.746	0.000168109	-12.5383	down
MEDN0239	C6H12O7	D-Gluconic Acid	526-95-4	466160	1760200	1409300	26098	33726	10648	1.70126	0.0193836	-5.68902	down
MEDN0456	C9H13N3O4	Deoxycytidine	951-77-9	20495	32584	45198	9	2061.6	672.99	1.46281	0.0279169	-5.16272	down
MEDN0609	C9H15N2O15P3	Uridine triphosphate(UTP)	63-39-8	83046	105620	112170	9451.5	9	9	1.46148	0.0314773	-4.98955	down
LIPID-P-1228	C61H98O6	TG(16:0_20:4_22:6)	-	53522	131120	105180	1121.5	2719.5	8123.2	1.65386	0.0412812	-4.59837	down
MEDP1423	C14H25NO6	Carnitine C7:DC	-	172550	1281200	523000	30695	16687	37308	1.61665	0.0428431	-4.54479	down
MEDP1100	C5H7N3	2-Aminomethylpyrimidine	372118-67-7	39133000	65008000	60351000	5845200	1267800	898760	1.6571	0.0487061	-4.35975	down
LIPID-N-0557	C49H79O13P	PI(20:4_20:4)	-	25247	63187	43043	2470.4	3260.9	1142.2	1.70165	0.0522791	-4.25762	down
MEDN1246	C6H9N3O2	3-(pyrazol-1-yl) -L-alanine	2734-48-7	21089000	37037000	34865000	3597600	750200	528590	1.64713	0.0524394	-4.25321	down
MEDP0689	C8H15NO2	TranexamicAcid	1197-18-8	198600	386450	360980	32475	4119.1	15436	1.62731	0.0549984	-4.18447	down
MEDP1035	C15H20O	alpha-hexylcinnamaldehyde	101-86-0	76031	16888	33444	9	7073.5	9	1.42026	0.0561201	-4.15534	down
MEDP0611	C8H11N3O3	N-Acetyl-L-Histidine	2497-02-1	190380	502770	646450	45602	40599	9	1.1739	0.064355	-3.9578	down
MEDP0017	C6H9N3O2	L-Histidine	71-00-1	609460000	798960000	767880000	102450000	22106000	18363000	1.65271	0.0656706	-3.92861	down
MEDP1429	C12H21NO6	Carnitine C5:DC	-	1025600	3393300	2332100	200420	91201	222930	1.65681	0.0762185	-3.71372	down
MEDN0285	C5H8O4	2-Methylsuccinic Acid	498-21-5	12188000	249190	1249700	969650	82126	128330	1.0223	0.0862216	-3.53581	down
MEDN0314	C5H8O4	Glutaric Acid	110-94-1	12188000	249190	1249700	969650	82126	128330	1.0223	0.0862216	-3.53581	down
MEDN0413	C5H8O4	Ethylmalonate	601-75-2	12188000	249190	1249700	969650	82126	128330	1.0223	0.0862216	-3.53581	down
MEDN1533	C5H8O4	Dimethylmalonic acid	595-46-0	12188000	249190	1249700	969650	82126	128330	1.0223	0.0862216	-3.53581	down
LIPID-P-0024	C27H53NO4	Carnitine C20:0	-	157230	390060	278120	27888	22946	24726	1.71648	0.0915424	-3.44942	down
MEDN0417	C6H12O4	(Rs)-Mevalonic Acid	150-97-0	131270	357930	592190	29999	45976	36755	1.61638	0.104245	-3.26194	down
MEDN0100	C6H5NO3	6-Hydroxynicotinic Acid	5006-66-6	24068	27401	36541	4017.6	5672.5	1614.1	1.65848	0.128442	-2.96081	down
LIPID-P-0282	C21H40O4	MG(18:1)	-	6466	3532.5	4255.2	594.43	189.05	1176.7	1.55958	0.137521	-2.86228	down
LIPID-P-0413	C27H56NO7P	LPE(22:0/0:0)	-	19302	22512	25153	3720.8	3852.2	3340.6	1.75382	0.16297	-2.61732	down
MEDN1459	C20H34O5	15-keto Prostaglandin F1α	21562-58-3	52695	32885	46441	9842.7	5631.7	6079.9	1.70655	0.163264	-2.61472	down
MEDN0120	C6H14O6	Dulcitol	608-66-2	225570	398720	468650	79454	78108	30418	1.62179	0.171995	-2.53956	down
MEDN0213	C6H14O6	D-Sorbitol	50-70-4	225570	398720	468650	79454	78108	30418	1.62179	0.171995	-2.53956	down
MEDN1011	C6H14O6	D-Mannitol	69-65-8	225570	398720	468650	79454	78108	30418	1.62179	0.171995	-2.53956	down
MEDN1662	C6H14O6	Galactitol	608-66-2	225570	398720	468650	79454	78108	30418	1.62179	0.171995	-2.53956	down
MEDN1555	C9H10O4	Isohomovanillic acid	1131-94-8	17330	7146.5	11034	9	6133.7	9	1.33063	0.173236	-2.52919	down
LIPID-P-0050	C27H49NO4	Carnitine C20:2	-	117140	78086	61923	9739	17443	17459	1.68579	0.1736	-2.52616	down
MEDN0795	C20H34O5	PGF2α	551-11-1	69583	48350	57956	16504	7580.5	6969	1.67101	0.176552	-2.50184	down
MEDP1913	C11H18N2O4	N(Alpha)-Acetyl-Epsilon-(2-Propenal)Lysine	99124-74-0	229260	201600	343340	79617	34860	29647	1.63486	0.186159	-2.4254	down
LIPID-N-0175	C25H49O12P	LPI(16:0/0:0)	-	98547	23733	60514	18968	8113.6	8871	1.47379	0.196684	-2.34605	down
LIPID-N-0144	C25H52NO7P	LPE(20:0/0:0)	-	49461	46834	65323	10225	8413.3	13175	1.72291	0.196843	-2.34489	down
MEDP1449	C25H38O4	MG(0:0/22:6/0:0)	-	311290	105300	137480	38061	44220	27136	1.59631	0.197479	-2.34023	down
MEDP1450	C25H38O4	MG(22:6/0:0/0:0)	-	311290	105300	137480	38061	44220	27136	1.59631	0.197479	-2.34023	down
LIPID-N-0063	C20H34O6	TXB2	-	68020	34879	31319	8182.5	11514	8985.1	1.66257	0.213694	-2.22638	down
MEDN0750	C20H30O3	(±)12-HEPE	81187-21-5	35277	20893	15557	4891.7	4145.8	6295.2	1.6558	0.213765	-2.2259	down
MEDN0752	C20H30O3	(±)15-HEPE	88852-33-9	35277	20893	15557	4891.7	4145.8	6295.2	1.6558	0.213765	-2.2259	down
MEDN0756	C20H30O3	(±)18-HEPE	141110-17-0	35277	20893	15557	4891.7	4145.8	6295.2	1.6558	0.213765	-2.2259	down
LIPID-N-0098	C20H32O2	FFA(20:4)	-	10021000	6932800	8482500	2221400	1765300	1812100	1.73254	0.227973	-2.13306	down
LIPID-P-0283	C21H38O4	MG(18:2)	-	1488.4	566.06	1332.5	266.81	321.9	189.86	1.58341	0.229873	-2.12109	down
MEDP1500	C21H28O2	16-Dehydroprogesterone	1096-38-4	54667	64865	41476	10268	18826	7990.9	1.65574	0.23033	-2.11823	down
MEDP1639	C21H30O4	Corticosterone	50-22-6	26318	30628	3150.5	7734.7	4820.6	1514.9	1.0361	0.234127	-2.09464	down
MEDP1415	C16H29NO6	Carnitine C9:DC	-	95684	524690	221370	62042	43428	93777	1.33974	0.236707	-2.07882	down
MEDN0765	C20H32O3	11,12-EET	123931-40-8	383810	256940	222200	109100	43917	51718	1.61067	0.23725	-2.07552	down
MEDP1726	C5H6N2O	3-Hydroxy-4-aminopyridine	52334-53-9	203230	343480	323630	72771	62910	74421	1.70916	0.241402	-2.05049	down
MEDN1328	C6H12O3	(S)-Leucic acid	13748-90-8	11344	44216	46714	10634	8209.5	5886.9	1.39461	0.241805	-2.04808	down
LIPID-N-0166	C22H45O9P	LPG(16:0/0:0)	-	525500	252130	429600	70759	119370	102410	1.64422	0.242323	-2.045	down
MEDN0244	C5H4N2O4	Orotic Acid	65-86-1	170150	208200	238910	44188	57778	48678	1.73604	0.244053	-2.03474	down
LIPID-P-0421	C27H54NO7P	LPE(22:1/0:0)	-	14072	8804.6	10220	2308.8	2705	3087	1.71477	0.244762	-2.03055	down
MEDP1410	C18H33NO6	Carnitine C11:DC	-	34866	72596	38209	6737.9	6390.9	22606	1.49772	0.245312	-2.02731	down
MEDN1691	C9H14N4O4	His-Ser	21438-60-8	401150	83687	73019	50668	44010	47154	1.21449	0.254245	-1.97571	down
LIPID-P-0399	C24H50NO6P	LPC(O-16:1)	-	8875700	4358600	6579200	1404000	1439700	2206600	1.64491	0.254892	-1.97204	down
MEDN1452	C20H32O5	11β-Prostaglandin E2	38310-90-6	51133	91165	64751	30523	12845	9491	1.55554	0.255297	-1.96975	down
MEDN1480	C23H37NO3	N-Arachidonoyl-L-Alanine	401941-73-9	3389.2	6613.9	10212	1624.9	2424.8	1207.4	1.52383	0.260058	-1.94309	down
LIPID-N-0628	C35H67O8P	PA(16:0_16:1)	-	83169	38396	41245	13618	10612	18188	1.60282	0.260537	-1.94044	down
LIPID-P-0025	C25H49NO5	Carnitine C18-OH	-	246180	166240	142590	60641	39369	46045	1.67862	0.263157	-1.926	down
LIPID-N-0062	C20H32O6	TxB3	-	7021.6	11200	3988.6	2890.1	830.15	2289	1.42367	0.270563	-1.88597	down
MEDN0057	C11H13NO4	N-Acetyl-L-Tyrosine	537-55-3	11739	42768	48100	13605	8910.1	5563.8	1.32912	0.273655	-1.86957	down
LIPID-N-0034	C20H32O3	(±)12-HETE	-	229200	137190	93139	15494	57409	55136	1.42323	0.278631	-1.84357	down
MEDN0485	C6H11Na3O12P2	D-Fructose-1,6-Biphosphate-Trisodium Salt	81028-91-3	314240	717930	433940	174970	167150	73035	1.52739	0.283168	-1.82027	down
MEDP1385	C24H43NO6	Carnitine C17:1:DC	-	27609	22784	20592	3626.6	8187.8	8360.9	1.61796	0.284219	-1.81492	down
MEDN0283	C4H8O3	2-Hydroxybutanoic Acid	600-15-7	5637200	26558000	16638000	6874300	4821700	2264800	1.27202	0.285887	-1.80648	down
MEDN0292	C4H8O3	3-Hydroxybutyrate	300-85-6	5637200	26558000	16638000	6874300	4821700	2264800	1.27202	0.285887	-1.80648	down
MEDN0333	C3H4O4	Malonicacid	141-82-2	5637200	26558000	16638000	6874300	4821700	2264800	1.27202	0.285887	-1.80648	down
MEDP1637	C21H28O4	11-Dehydrocorticosterone	72-23-1	23418	16977	17500	5332	5651.1	5583	1.73672	0.28614	-1.8052	down
LIPID-N-0167	C24H49O9P	LPG(18:0/0:0)	-	157800	65770	85309	26159	28406	33965	1.59923	0.286617	-1.8028	down
MEDN0323	C10H7NO3	Kynurenic Acid	492-27-3	249010	91798	106160	35851	47652	46708	1.52915	0.291321	-1.77932	down
MEDN1557	C6H9O9P	L-Ascorbic acid 2-phosphate	23313-12-4	44692	82638	102530	33743	20550	13572	1.51812	0.295245	-1.76002	down
LIPID-P-0455	C22H44NO9P	LPS(16:0/0:0)	116947-34-3	26837	16451	29778	4121	9250.9	8209.3	1.57762	0.295366	-1.75943	down
MEDN0319	C9H10O4	4-Hydroxy-3-methoxyphenylacetic acid	306-08-1	51594	27209	40304	8794.1	17256	9161.4	1.60126	0.295629	-1.75814	down
LIPID-P-0411	C23H48NO7P	LPE(18:0/0:0)	-	9004300	7469900	7666800	2783900	1876600	2484500	1.71855	0.29597	-1.75648	down
MEDN0385	C12H24O2	FFA(12:0)	143-07-7	2517100	1983600	3429100	963540	929890	458650	1.59786	0.296613	-1.75335	down
MEDN1414	C17H28O3	12-HHT	54397-84-1	21471	14829	10879	7058.3	4337.8	2710	1.54591	0.298991	-1.74183	down
LIPID-P-0026	C10H17NO6	Carnitine C3:1-2OH	910825-21-7	4800600	5348100	3423800	1734800	1139600	1191400	1.67971	0.299562	-1.73908	down
MEDN1493	C4H8O3	(R)-3-Hydroxybutanoic acid	625-72-9	456030	2158400	1320700	584000	411400	183750	1.24143	0.299647	-1.73866	down
LIPID-P-0044	C29H55NO4	Carnitine C22:1	-	68874	58560	63347	19876	14864	22478	1.71758	0.299915	-1.73738	down
LIPID-N-0192	C24H46NO9P	LPS(18:1/0:0)	89319-60-8	371540	319380	217460	83676	62948	126350	1.61883	0.300506	-1.73453	down
LIPID-P-0006	C11H21NO5	Carnitine C4-OH	-	5559400	5784100	3726200	2004500	1272300	1291400	1.66545	0.303138	-1.72195	down
LIPID-P-0398	C22H46NO6P	LPC(O-14:1)	-	14576	21273	16489	6414.3	6097.7	3370.4	1.64785	0.303458	-1.72043	down
MEDN0793	C20H32O5	Prostaglandin E2	363-24-6	74616	139420	88776	56111	19696	16542	1.47539	0.304971	-1.71325	down
LIPID-P-0009	C13H25NO5	Carnitine C6-OH	-	175430	338720	329750	101440	84239	74867	1.63235	0.30874	-1.69553	down
LIPID-P-0440	C23H48NO6P	LPE(P-18:0)	174062-73-8	3992000	7259000	5514300	1963300	1277400	1958100	1.64101	0.310093	-1.68923	down
MEDN1098	C6H12O3	2-ethyl-2-hydroxybutyric acid	3639-21-2	120840	295340	221540	49680	67778	82367	1.55369	0.313343	-1.67419	down
LIPID-P-0022	C23H45NO5	Carnitine C16-OH	195207-76-2	238190	129980	160440	55517	51091	60026	1.67093	0.315231	-1.66552	down
LIPID-P-0445	C23H46NO6P	LPE(P-18:1)	-	4935200	4381600	3987400	1257100	948410	1991100	1.64417	0.315435	-1.66459	down
LIPID-N-0024	C20H30O2	FFA(20:5)	10417-94-4	534610	728120	516740	281550	152070	129300	1.61379	0.316341	-1.66045	down
LIPID-P-0393	C22H48NO6P	LPC(O-14:0)	-	8439.6	12418	7368.3	5551.5	1414.9	2059.4	1.45228	0.31977	-1.64489	down
LIPID-P-0252	C41H70O5	DG(18:1_20:4)	-	221780	267640	290410	106410	61885	82617	1.6803	0.321752	-1.63598	down
LIPID-P-0438	C21H44NO6P	LPE(P-16:0)	174062-72-7	7338400	6338000	8300200	2438500	1873300	2803700	1.70417	0.323776	-1.62693	down
LIPID-P-0294	C42H81NO8	HexCer(d18:1/18:0)	-	17315	21067	48841	7313.9	11565	9432.8	1.46782	0.32459	-1.62331	down
LIPID-P-0213	C37H68O5	DG(16:1_18:1)	-	66821	51043	42944	12495	20239	19601	1.66147	0.32545	-1.61949	down
LIPID-P-1150	C59H102O6	TG(18:0_18:2_20:4)	-	524500	635720	590530	77666	102090	391170	1.4222	0.326104	-1.6166	down
MEDN0432	C6H12O3	5-Hydroxyhexanoic Acid	185956-02-9	14787	31680	30479	9396	9736.8	5971.9	1.55461	0.326264	-1.61589	down
MEDN1499	C6H12O3	2-Hydroxyhexanoic acid	6064-63-7	14787	31680	30479	9396	9736.8	5971.9	1.55461	0.326264	-1.61589	down
LIPID-P-1116	C59H104O6	TG(18:0_18:1_20:4)	-	311690	434240	296720	86697	49379	204700	1.45358	0.326836	-1.61336	down
LIPID-P-0470	C28H44NO9P	LPS(22:6/0:0)	-	376940	222040	160670	92715	64408	91541	1.56081	0.32734	-1.61114	down
MEDP1455	C23H38O4	MG(20:4/0:0/0:0)	-	357750	145400	265400	70709	97275	84571	1.55391	0.328612	-1.60554	down
MEDP0051	C7H14N2O4S	L-Cystathionine	56-88-2	41549	10416	33591	3292.5	8457.8	16508	1.17936	0.33029	-1.59819	down
MEDP0357	C6H6N2O2	Urocanic Acid	104-98-3	1058400	234550	456710	377610	90239	111500	1.17236	0.331121	-1.59457	down
LIPID-P-0115	C40H79NO3	Cer(d18:1/22:0)	-	435620	379280	221600	84381	151760	107630	1.58888	0.331665	-1.5922	down
MEDN0022	C8H14N2O5	(5-L-Glutamyl)-L-Amino Acid	5875-41-2	81443	227620	173010	69791	54869	35377	1.45099	0.331977	-1.59085	down
MEDN0658	C16H30O4	Hexadecanedioic acid	505-54-4	441820	244420	192880	123910	96326	72417	1.54302	0.332893	-1.58687	down
MEDN0480	C3H7O6P	Dl-Glyceraldehyde3-Phosphate	591-59-3	6578900	16984000	8898600	3578200	5713100	1574400	1.37265	0.334726	-1.57895	down
MEDP0889	C21H30O5	Cortisol	50-23-7	171710	215940	82526	55440	56224	45858	1.52694	0.335028	-1.57765	down
LIPID-N-0196	C24H44NO9P	LPS(18:2/0:0)	-	87086	45463	64082	11118	26311	29922	1.48058	0.342525	-1.54572	down
LIPID-P-1046	C55H98O6	TG(16:0_16:0_20:4)	-	119280	97002	157210	13639	20206	96583	1.32305	0.349212	-1.51782	down
MEDN0390	C20H30O2	EPA	10417-94-4	8891500	17355000	10415000	6720200	4107200	2166900	1.44502	0.35444	-1.49639	down
LIPID-P-0403	C26H52NO6P	LPC(O-18:2)	-	62968	22570	46178	10482	15143	21210	1.41261	0.355576	-1.49177	down
MEDP1961	C15H21N5O8	Ribosyladenosine	-	256180	119620	174530	46669	60142	89725	1.52614	0.357124	-1.4855	down
MEDN0376	C18H34O4	9,10-DiHOME	-	50267	61494	58417	27951	13940	18987	1.63319	0.357731	-1.48305	down
MEDN1081	C18H34O4	12,13-DiHOME	263399-35-5	50267	61494	58417	27951	13940	18987	1.63319	0.357731	-1.48305	down
MEDP1695	C24H50NO6P	LPC(O-16:1/0:0)	97802-53-4	95513000	90829000	120570000	38430000	55894000	16265000	1.47427	0.360328	-1.47262	down
MEDP0367	C4H9NO2	γ-Aminobutyric Acid	56-12-2	129680	70660	167170	40085	63337	29531	1.46357	0.361767	-1.46687	down
LIPID-P-0266	C43H72O5	DG(18:0_22:6)	-	65549	54374	53430	12355	27998	23595	1.58697	0.368889	-1.43874	down
LIPID-P-0239	C39H68O5	DG(16:0_20:4)	-	219440	150570	251930	55089	121810	53001	1.52099	0.36965	-1.43577	down
LIPID-N-0198	C26H44NO9P	LPS(20:4/0:0)	-	176350	96231	112940	28641	53683	61893	1.51446	0.374083	-1.41857	down
LIPID-P-0418	C23H46NO7P	LPE(18:1/0:0)	-	1848100	1368700	1643000	776600	375020	668880	1.58641	0.374604	-1.41656	down
MEDN1597	C21H44NO6P	Phosphatidylethanolamine lyso alkenyl 16:0	-	993900	1015600	1313100	422640	640120	191600	1.46652	0.377524	-1.40536	down
MEDP0576	C12H28N4O	N1-Acetylspermine	25593-72-0	63001	127320	150900	57430	49515	22105	1.37263	0.378201	-1.40278	down
LIPID-P-0400	C26H54NO6P	LPC(O-18:1)	-	1574800	848630	1447700	387570	441830	644220	1.56056	0.380669	-1.39339	down
MEDN1438	C20H34O4	(±)8(9)-DiHET	192461-96-4	7789.4	7979.4	7475.1	3090.6	1838.8	3928	1.60264	0.381063	-1.3919	down
MEDN1439	C20H34O4	(±)11(12)-DiHET	-	7789.4	7979.4	7475.1	3090.6	1838.8	3928	1.60264	0.381063	-1.3919	down
MEDN0604	C14H26O4	Tetradecanedioic acid	821-38-5	561240	425910	282880	179040	162260	144460	1.607	0.382479	-1.38655	down
MEDP1373	C29H53NO4	Carnitine C22:2	-	207000	178520	226850	87774	113650	33266	1.44407	0.383249	-1.38365	down
LIPID-N-0515	C47H85O13P	PI(18:1_20:2)	-	24996	54013	24432	32453	3465.5	3868.5	1.19604	0.384635	-1.37844	down
LIPID-P-0394	C24H52NO6P	LPC(O-16:0)	-	1450800	783060	1502600	383930	542220	518660	1.56323	0.386679	-1.37079	down
LIPID-P-0689	C46H75O10P	PG(18:2_22:6)	-	3891.7	4745.3	4184	1023	951.89	2986.6	1.44901	0.386982	-1.36966	down
LIPID-P-1202	C59H98O6	TG(16:1_16:1_24:6)	-	33987	34617	18493	1652.1	7239.9	24876	1.16862	0.387706	-1.36697	down
LIPID-P-0350	C22H46NO7P	LPC(14:0/0:0)	20559-16-4	1012600	518990	1153800	288770	392710	362760	1.5155	0.38886	-1.36268	down
LIPID-P-0376	C30H60NO7P	LPC(22:1/0:0)	-	12878	15910	17040	6238.7	5568.7	6030.2	1.72843	0.389229	-1.36131	down
LIPID-N-0560	C38H74NO10P	PS(16:0_16:0)	-	289100	109150	56938	41935	87328	48117	1.05412	0.389685	-1.35962	down
LIPID-N-0142	C23H48NO7P	LPE(0:0/18:0)	-	3171100	2600400	2650300	1278300	923260	1091700	1.70867	0.39104	-1.35461	down
LIPID-P-0395	C26H56NO6P	LPC(O-18:0)	-	138300	159520	196940	54725	65114	74182	1.69196	0.392152	-1.35052	down
LIPID-N-0188	C26H52NO9P	LPS(20:0/0:0)	-	27393	38042	27494	10421	11148	15043	1.6707	0.393978	-1.34381	down
LIPID-N-0141	C21H44NO7P	LPE(17:0/0:0)	-	234650	239890	189740	114370	53407	94095	1.57243	0.394219	-1.34293	down
MEDN0760	C20H32O3	(±)5-HETE	-	59877	73489	69636	31236	24833	24218	1.72021	0.395499	-1.33826	down
MEDN0763	C20H32O3	(±)9-HETE	79495-85-5	59877	73489	69636	31236	24833	24218	1.72021	0.395499	-1.33826	down
LIPID-P-0466	C26H46NO9P	LPS(20:3/0:0)	-	19398	15316	15774	8503	5097	6577.7	1.65412	0.399653	-1.32318	down
LIPID-P-1105	C57H100O6	TG(16:0_18:1_20:4)	-	502860	344910	584920	66003	86158	421500	1.26434	0.400408	-1.32046	down
LIPID-P-0415	C21H42NO7P	LPE(16:1/0:0)	-	9110.3	6859.1	9427.5	4678.4	2185.6	3379	1.55774	0.403317	-1.31001	down
LIPID-P-0441	C25H52NO6P	LPE(P-20:0)	-	44657	76711	42246	23775	12984	29422	1.45723	0.404495	-1.30581	down
LIPID-P-1090	C53H92O6	TG(14:0_16:1_20:4)	-	17779	23283	29808	3113	18535	7020.8	1.29353	0.404527	-1.30569	down
LIPID-P-0371	C26H52NO7P	LPC(18:1/0:0)	-	245270	180320	214730	89219	64725	109010	1.63436	0.41066	-1.28398	down
LIPID-N-0140	C21H44NO7P	LPE(16:0/0:0)	-	4766100	3096600	4283700	1879300	1601800	1512900	1.66862	0.411151	-1.28226	down
MEDN0210	C6H12O5	1,5-Anhydro-D-Glucitol	154-58-5	37419	67927	57613	34883	15842	16509	1.45704	0.412582	-1.27725	down
MEDN0231	C6H12O5	L-Fucose	2438-80-4	37419	67927	57613	34883	15842	16509	1.45704	0.412582	-1.27725	down
MEDN0232	C6H12O5	L-Rhamnose	3615-41-6	37419	67927	57613	34883	15842	16509	1.45704	0.412582	-1.27725	down
MEDP1076	C12H22O11	Kojibiose	2140-29-6	110970	63221	55958	48633	10549	37549	1.21366	0.420297	-1.25052	down
LIPID-N-0169	C22H43O9P	LPG(16:1/0:0)	-	38720	27878	18450	6713.1	9205.2	19975	1.34878	0.422036	-1.24456	down
LIPID-P-1178	C59H100O6	TG(18:1_18:2_20:4)	-	45483	74056	38346	2370.5	11817	52481	1.11564	0.42226	-1.2438	down
LIPID-N-0151	C25H50NO7P	LPE(0:0/20:1)	-	113280	75891	94956	36839	36845	46335	1.67144	0.422413	-1.24327	down
MEDN1446	C20H36O3	11-HEDE	5598-37-8	21050	15093	15613	10965	5003.6	6089.6	1.51955	0.426196	-1.23041	down
MEDN1447	C20H36O3	15-HEDE	77159-57-0	21050	15093	15613	10965	5003.6	6089.6	1.51955	0.426196	-1.23041	down
LIPID-N-0109	C24H50NO7P	LPC(16:0/0:0)	-	7209800	4428400	7396200	2460300	2640900	3033100	1.61421	0.427347	-1.22652	down
LIPID-P-0714	C42H74NO10P	PS(16:0_20:4)	-	293560	212220	207080	108270	96258	101800	1.69285	0.429717	-1.21854	down
MEDP0145	C7H8N4O2	1,7-Dimethylxanthine	611-59-6	76116	156180	81880	83931	29033	22326	1.26515	0.430619	-1.21552	down
MEDP1479	C7H8N4O2	Theophylline	58-55-9	76116	156180	81880	83931	29033	22326	1.26515	0.430619	-1.21552	down
LIPID-N-0475	C41H77O13P	PI(16:0_16:1)	-	262630	153870	58208	76335	78770	49444	1.05203	0.430894	-1.21459	down
LIPID-P-0092	C49H76O2	CE(22:6)	70110-50-8	11390	20857	5024.5	6163.4	7326	2570.7	1.05946	0.430895	-1.21459	down
LIPID-P-0023	C25H49NO4	Carnitine C18:0	25597-09-5	1927900	1850700	1856700	688270	910910	829100	1.73125	0.430905	-1.21456	down
LIPID-N-0152	C25H50NO7P	LPE(20:1/0:0)	-	103750	71283	92816	44847	25318	45418	1.55542	0.431523	-1.21249	down
LIPID-N-0082	C16H30O2	FFA(16:1)	-	626700	399100	301710	186500	223320	164510	1.52876	0.432637	-1.20877	down
MEDN1692	C23H44NO6P	Phosphatidylethanolamine lyso alkenyl 18:2	-	7810700	8934700	10545000	3698800	4916000	3254800	1.66408	0.434937	-1.20112	down
MEDN1264	C27H48NO7P	LPE(0:0/22:4)	-	242000	150430	451720	106670	133720	126930	1.31486	0.435136	-1.20046	down
LIPID-P-0469	C28H46NO9P	LPS(22:5/0:0)	-	17655	12261	6244.4	3354.8	6612.4	5794.3	1.29035	0.435877	-1.19801	down
MEDN1269	C27H44NO7P	LPE(0:0/22:6)	-	1732000	1817500	2411000	1093000	886310	621840	1.59972	0.436398	-1.19628	down
MEDP0035	C11H12N2O3	5-Hydroxy-L-Tryptophan	56-69-9	28264	58440	41469	19328	23251	13371	1.48223	0.436519	-1.19588	down
MEDN0781	C20H34O6	6 keto-PGF1α	58962-34-8	1824300	1578900	931880	1203900	318030	374820	1.26713	0.437535	-1.19253	down
MEDN0533	C10H12N4O6	Xanthosine	146-80-5	1890000	2683300	3454100	1333600	1077500	1105600	1.59343	0.438087	-1.19071	down
LIPID-P-0382	C30H58NO7P	LPC(22:2/0:0)	-	14111	5675.1	14663	1809.6	7599.9	5708.2	1.13657	0.438842	-1.18823	down
LIPID-N-0567	C40H76NO10P	PS(16:0_18:1)	-	552140	364100	208100	128020	239900	125630	1.32426	0.438969	-1.18781	down
MEDN0494	C20H32O4	8,15-Dihete	80234-65-7	3299000	2836600	2427400	1997600	1055500	728540	1.45086	0.441626	-1.1791	down
MEDP1693	C20H42NO7P	LPC(12:0/0:0)	-	365070	305180	737700	162060	383940	76689	1.17337	0.442266	-1.17701	down
MEDN0019	C11H12N2O2	L-Tryptophan	73-22-3	7574000	15579000	14705000	7164500	5102300	4556600	1.45239	0.444382	-1.17013	down
MEDN0368	C19H40NO7P	LPE(14:0/0:0)	-	530810	476240	790500	251710	477330	78666	1.20457	0.449337	-1.15413	down
LIPID-P-0225	C37H66O5	DG(16:0_18:3)	-	6024.8	8386.7	19259	5910.9	4847	4474.4	1.21017	0.452393	-1.14435	down
LIPID-P-1098	C55H96O6	TG(16:0_16:1_20:4)	-	66303	119210	114300	13030	33311	89625	1.17437	0.453503	-1.14082	down
LIPID-P-0374	C28H56NO7P	LPC(20:1/0:0)	-	522100	435700	721920	204190	206820	354350	1.51355	0.455647	-1.13401	down
MEDN1602	C10H13N5O4	3-Deoxyguanosine	3608-58-0	141170	114040	125390	81402	45143	47596	1.57789	0.457543	-1.12802	down
LIPID-N-0090	C18H32O2	FFA(18:2)	-	3787100	2745600	2654800	1355900	1325500	1547000	1.6745	0.460234	-1.11956	down
LIPID-N-0084	C18H34O2	FFA(18:1)	-	7290500	5072100	4209500	3078500	2197200	2361200	1.56936	0.460829	-1.1177	down
MEDP0244	C20H32O	All-Trans-13,14-Dihydroretinol	115797-14-3	206570	111540	103540	94240	34460	66511	1.28616	0.462969	-1.11101	down
MEDP1405	C21H41NO4	Carnitine??C14:0	-	3280200	2884500	5281400	2032000	2021100	1255700	1.48125	0.463809	-1.1084	down
MEDN0250	C17H20N4O6	Riboflavin	83-88-5	178110	122060	183450	88518	78665	58350	1.58927	0.466343	-1.10054	down
LIPID-P-0128	C36H71NO3	Cer(d16:1/20:0)	-	29982	14604	18987	9476.8	17043	3398.4	1.1696	0.470612	-1.08739	down
MEDP0336	C22H46NO7P	LPC(0:0/14:0)	20559-16-4	6610700	5038100	6232100	3130500	3799000	1523100	1.43876	0.472717	-1.08095	down
LIPID-P-0122	C38H73NO3	Cer(d18:1/20:1)	-	11738	15865	17748	9446.8	6539	5509.6	1.554	0.473979	-1.07711	down
LIPID-N-0187	C24H48NO9P	LPS(18:0/0:0)	119786-67-3	297130	199280	202240	120790	84277	126440	1.57249	0.474497	-1.07553	down
MEDN0391	C22H32O2	DHA	6217-54-5	25344000	20224000	18742000	13341000	10305000	6889500	1.54305	0.474817	-1.07456	down
LIPID-P-0021	C23H45NO4	Carnitine C16:0	2364-67-2	2410400	1987100	2434600	746070	1419700	1083600	1.57348	0.475603	-1.07217	down
LIPID-P-0401	C28H58NO6P	LPC(O-20:1)	-	7753.5	7445.9	7756.4	2836.1	2539.9	5568.3	1.49717	0.476755	-1.06868	down
LIPID-N-0521	C45H79O13P	PI(18:2_18:2)	-	63932	119560	34916	30064	48395	26009	1.12229	0.478316	-1.06396	down
MEDN0372	C19H39O7P	LPA(0:0/16:0)	-	139670	122390	240190	69847	103910	68971	1.44414	0.483281	-1.04907	down
MEDN1600	C19H39O7P	LPA(16:0/0:0)	22002-85-3	139670	122390	240190	69847	103910	68971	1.44414	0.483281	-1.04907	down
MEDN0502	C5H11O7P	2-Deoxyribose 1-Phosphate	17210-42-3	230580	256340	349640	124110	137090	144210	1.64983	0.484616	-1.04509	down
MEDN1457	C20H34O5	8-iso Prostaglandin F2α	27415-26-5	5018.8	15176	18193	6614.2	5599.3	6400.5	1.03502	0.484894	-1.04426	down
MEDN1460	C20H34O5	11β-Prostaglandin F2α	38432-87-0	5018.8	15176	18193	6614.2	5599.3	6400.5	1.03502	0.484894	-1.04426	down
LIPID-P-0802	C56H108O6	TG(17:0_18:0_18:0)	-	25175	20610	20051	11768	5923.1	14234	1.42927	0.484919	-1.04419	down
LIPID-P-0020	C21H41NO5	Carnitine C14-OH	-	67485	35156	38379	28384	18797	21303	1.44513	0.485633	-1.04206	down
MEDN0311	C12H22O4	Dodecanedioic Aicd	693-23-2	11685	13270	9116.3	6520.4	6542.6	3549.9	1.50247	0.487592	-1.03625	down
LIPID-P-0129	C38H75NO3	Cer(d16:1/22:0)	-	37867	22257	32538	16325	21895	6993.6	1.28582	0.487941	-1.03522	down
LIPID-N-0094	C18H30O2	FFA(18:3)	-	311990	217590	191910	113150	105340	134220	1.59418	0.488863	-1.0325	down
LIPID-P-0140	C41H79NO3	Cer(d18:2/23:0)	-	18628	29098	46468	15333	10870	20234	1.26827	0.492993	-1.02036	down
LIPID-P-0959	C48H86O6	TG(14:1_15:1_16:1)	-	13011	16365	18597	9095.2	9717.9	4842	1.47422	0.493092	-1.02007	down
MEDP0446	C10H12N2O4	3-Hydroxykynurenine	2147-61-7	92033	137780	165030	60992	86263	48020	1.45891	0.494564	-1.01577	down
LIPID-P-0381	C28H54NO7P	LPC(20:2/0:0)	-	305410	188270	390780	121560	122550	193480	1.38717	0.494754	-1.01522	down
MEDN1287	C21H42NO7P	LPE(0:0/16:1)	-	556990	795770	633430	476050	354490	153940	1.31888	0.495663	-1.01257	down
LIPID-P-0219	C41H76O5	DG(18:1_20:1)	-	11238	25517	26705	10228	5328.2	15965	1.13529	0.49671	-1.00953	down
MEDP1658	C26H54NO6P	LPC(O-18:1/0:0)	87907-66-2	16681000	17690000	25925000	10016000	13279000	6727400	1.4664	0.497917	-1.00602	down
LIPID-P-0404	C28H56NO6P	LPC(O-20:2)	-	24371	20513	21707	7380.1	7763.4	18065	1.40221	0.498694	-1.00377	down
MEDP0147	C7H11N3O2	1-Methylhistidine	332-80-9	279220	475450	499620	89054	474150	62716	1.13528	0.499023	-1.00282	down
LIPID-N-0551	C49H83O13P	PI(18:0_22:6)	-	192450	76710	98217	79857	44658	59007	1.23423	0.499547	-1.00131	down
MEDN1686	C5H9NO4	L-threo-3-Methylaspartate	6061-13-8	2839600	3582700	3305700	6968200	7006400	5554600	1.68642	2.00752	1.00542	up
MEDP1912	C10H20N2O4	Thr-Leu	50299-12-2	910810	422090	798490	1921900	1223800	1147500	1.3881	2.01427	1.01026	up
MEDP1947	C9H18N2O4	Ser-Ile	91086-51-0	898220	403410	829590	1902200	1178500	1217500	1.37837	2.01678	1.01205	up
MEDN0499	C10H18N4O6	Argininosuccinic acid	2387-71-5	7695000	5636200	8134900	16928000	13684000	13387000	1.65328	2.0497	1.03541	up
MEDP2047	C11H16N2O8	N-Acetyl-Asp-Glu	3106-85-2	2206700	806910	2446800	2726600	3684500	4815400	1.26895	2.05598	1.03983	up
MEDP0078	C18H20N2O3	Phe-Phe	2577-40-4	19978	16285	22214	50061	34890	35298	1.63097	2.05635	1.04008	up
MEDP1280	C15H22N6O5S	S-Adenosyl-L-Methionine	17176-17-9	318170	358790	1256500	1653100	1185200	1164700	1.26096	2.07038	1.0499	up
MEDP1888	C9H18N2O4	Ser-Leu	6665-16-3	858840	413260	815290	1964800	1201800	1290700	1.4412	2.13535	1.09447	up
MEDP0229	C12H22O11	Lactose	63-42-3	136650	199360	175410	420750	459620	218290	1.42536	2.14825	1.10316	up
MEDP0230	C12H22O11	Maltose	69-79-4	136650	199360	175410	420750	459620	218290	1.42536	2.14825	1.10316	up
MEDP1742	C12H16N2O3	Ala-Phe	3061-90-3	292470	173740	284660	554250	545460	513890	1.62106	2.14897	1.10365	up
MEDN0460	C9H23N3O	N8-Acetylspermidine	34450-15-2	1144.9	3790.9	6991.1	7899.5	10788	6950.2	1.17793	2.14957	1.10405	up
MEDN0531	C6H10O8	D-Glucarate	87-73-0	11022	18977	26666	38416	57627	26274	1.31638	2.1586	1.1101	up
MEDP1851	C13H16N2O6	Asp-Tyr	22840-03-5	796470	600870	840700	1880300	1414100	1537200	1.66989	2.15885	1.11027	up
MEDN0561	C11H16N2O8	N-Acetylaspartylglutamic acid	3106-85-2	3043600	1156800	2836000	3662800	7339200	4570900	1.31395	2.21319	1.14613	up
MEDP0052	C3H7NO2S	L-Cysteine	52-90-4	57983	57070	167490	207270	254370	166670	1.36396	2.22377	1.15301	up
MEDP0658	C14H28O2	Ethyl dodecanoate	106-33-2	1198600	1597600	4472500	5804900	4989300	5495600	1.36207	2.24109	1.1642	up
MEDP1930	C12H14N2O3	Cyclo(Tyr-Ala)	21754-26-7	119850	60026	114550	177800	252170	230070	1.52168	2.24179	1.16465	up
MEDP0037	C13H16N2O5	Asp-phe	13433-09-5	2544200	1448600	3024900	4188200	5777000	6215500	1.52383	2.3057	1.2052	up
MEDP0409	C5H10N2O3S	Cys-Gly	19246-18-5	600270	605330	921410	2150600	1550400	1212500	1.56226	2.31005	1.20792	up
LIPID-N-0650	C43H71O8P	PA(18:1_22:6)	-	27342	12278	52947	99097	61761	55727	1.29778	2.33976	1.22636	up
MEDP0016	C5H9NO4	L-Glutamic Acid	56-86-0	78687000	97712000	92056000	277210000	160140000	210100000	1.64166	2.41176	1.27009	up
MEDP1425	C14H27NO5	Carnitine C7-OH	-	19308	65245	34102	148970	53636	92125	1.26789	2.48393	1.31263	up
MEDP1507	C13H17N3O4	Phe-Asn	-	59537	35633	75409	189700	130270	115310	1.54507	2.55178	1.3515	up
MEDP1434	C11H19NO6	Carnitine C4:DC	-	1181900	1277400	1127700	3667800	3589400	2169900	1.64702	2.62813	1.39404	up
MEDP1950	C10H13N4O7P	2'-Deoxyinosine-5'-monophosphate	3393-18-8	156970	832960	1158300	2786000	2015200	907400	1.12478	2.65735	1.40999	up
MEDN1117	C17H27N3O17P2	Uridine-5'-diphospho-N-acetylgalactosamine??disodium??salt	528-04-1	10345	15149	37775	50040	102790	27529	1.22474	2.85067	1.5113	up
MEDN0452	C9H14N3O7P	2'-Deoxycytidine-5'-Monophosphate	1032-65-1	508940	406430	743680	1942500	1816900	1106800	1.5985	2.93312	1.55244	up
MEDP1412	C20H37NO4	Carnitine C13:1	-	10112	30894	29713	72982	71647	69656	1.50872	3.03009	1.59936	up
MEDP0044	C10H17N3O6S	Glutathione Reducedform	70-18-8	16051000	15308000	26313000	69096000	60677000	46645000	1.65537	3.05899	1.61305	up
MEDN0478	C3H5NO4	Aminomalonic Acid	1068-84-4	104420	71637	96901	141960	401980	355120	1.48797	3.29377	1.71974	up
MEDP0180	C11H15N2O8P	Β-Nicotinamide Mononucleotide	1094-61-7	835950	231300	427160	582620	2004200	2387300	1.25298	3.32848	1.73487	up
MEDN0201	C4H6O4	Succinic Acid	110-15-6	2771200	1691200	2738700	4763400	11908000	10807000	1.56212	3.81586	1.93201	up
MEDN0335	C4H6O4	Methylmalonic Acid	516-05-2	2771200	1691200	2738700	4763400	11908000	10807000	1.56212	3.81586	1.93201	up
MEDP0036	C5H7NO3	5-Oxoproline	149-87-1	1731500	2263200	2140700	11602000	4154600	8015800	1.59058	3.87463	1.95406	up
MEDN0538	C15H24N2O17P2	UDP-glucose	133-89-1	111130	115750	272280	289150	1238500	713770	1.42333	4.49038	2.16684	up
MEDN1087	C15H24N2O17P2	UDP-D-galactose	2956-16-3	111130	115750	272280	289150	1238500	713770	1.42333	4.49038	2.16684	up
MEDP0173	C21H27N7O14P2	Nicotinic Acid Adenine Dinucleotide	53-84-9	345680	112900	650710	231900	3462600	3779500	1.062	6.73764	2.75224	up
